# Supplementary material for: Synthesis process and adsorption performance of temperature-sensitive ion-imprinted porous microspheres (ReO4−-TIIM) for the selective separation of ReO4−
Source: Royal Society of Chemistry journal article supplement (doi:10.1039/d2nj05400k), 2023-01-01
Supplement: d2nj05400k1.pdf [file d2nj05400k1.pdf]

## Supporting Information

### **Synthesis process and adsorption performance of temperature-sensitive ion-imprinted porous microspheres (ReO<sub>4</sub><sup>-</sup>-TIIM) for the selective separation of ReO<sub>4</sub><sup>-</sup>**

In order to study the practical application effect of CS-RE-TIICM, the separation ability of CS-RE-TIICM on Re was investigated using the secondary leaching solution of high-temperature alloys as the target solution. The high temperature alloy secondary leaching solution was prepared: Firstly, the waste high-temperature alloy grinding was dissolved in HCl(36%)-H<sub>2</sub>O(2:1, v/v) at 80°C for 4 h with solid-liquid ratio 1:8. After that, the solution was stored, and the residue was collected and dissolved in mixture of HCl(36%) and H<sub>2</sub>O<sub>2</sub>(30%) (1:2, v/v) for 4 h with a solid-liquid ratio of 10:1 to obtain the secondary leachate. After filtration the residue, the secondary leaching solution was obtained. Secondly, the secondary leaching solution was oxidized by adding to HNO<sub>3</sub>(65%) (10:1, v/v) and H<sub>2</sub>O<sub>2</sub>(30%) (1:1, v/v), and reacted in an autoclave at 180°C for 48 h to obtain a final adsorption solution.
